# Supplementary material
Source: Springer Nature journal article supplement (https://www.springermedizin.de/resource/supplementary/12885_2009_1767_MOESM4_ESM.pdf/9472892)

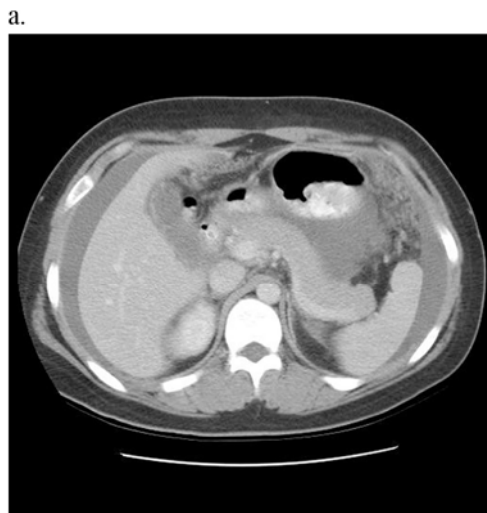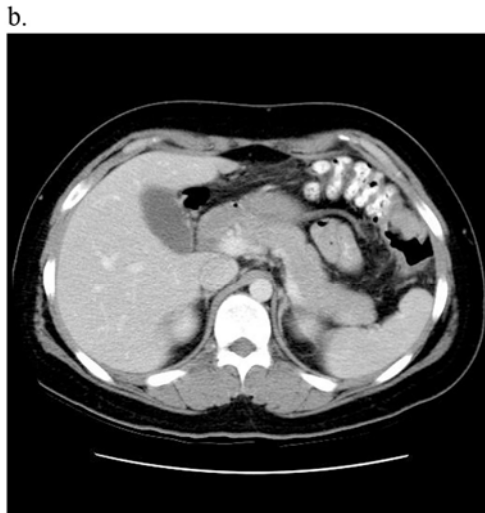

c.

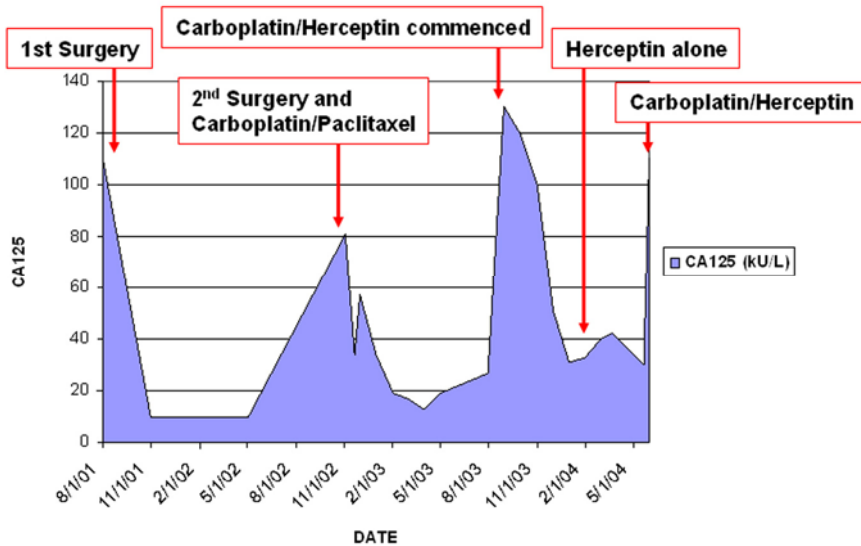

Supplement: MOESM4 [file 9472892]
